# Supplementary material
Source: publisher site journal article supplement (https://www.spandidos-publications.com/770/downloadSupplementary)
Supplement: Supplementary file 1 [file downloadSupplementary]

Table SV. Predictions of target genes for miRNAs potentially sponged to hsa\_circ\_0000520.

| miRNA           | Gene    | miRDB | miRTarBase | TargetScan | Sum |
|-----------------|---------|-------|------------|------------|-----|
| hsa-miR-6825-5p | XPO6    | 1     | 1          | 1          | 3   |
| hsa-miR-4487    | BTG2    | 1     | 1          | 1          | 3   |
| hsa-miR-4324    | CHIC1   | 1     | 1          | 1          | 3   |
| hsa-miR-4713-5p | ZCCHC24 | 1     | 1          | 1          | 3   |
| hsa-miR-6825-5p | LBX1    | 1     | 1          | 1          | 3   |
| hsa-miR-7160-5p | SUMF2   | 1     | 1          | 1          | 3   |
| hsa-miR-6825-5p | PHF8    | 1     | 1          | 1          | 3   |
| hsa-miR-6867-3p | DYNLL2  | 1     | 1          | 1          | 3   |
| hsa-miR-6847-5p | GPATCH8 | 1     | 1          | 1          | 3   |
| hsa-miR-4324    | CTBP1   | 1     | 1          | 1          | 3   |
| hsa-miR-6825-5p | CBX8    | 1     | 1          | 1          | 3   |
| hsa-miR-1227-5p | HHLA3   | 1     | 1          | 1          | 3   |
| hsa-miR-7160-5p | SOAT1   | 1     | 1          | 1          | 3   |
| hsa-miR-6822-3p | AKAP12  | 1     | 1          | 1          | 3   |
| hsa-miR-7113-3p | DYNLL2  | 1     | 1          | 1          | 3   |
| hsa-miR-4324    | ABRACL  | 1     | 1          | 1          | 3   |
| hsa-miR-6796-3p | MBTPS2  | 1     | 1          | 1          | 3   |
| hsa-miR-7106-5p | PAX2    | 1     | 1          | 1          | 3   |
| hsa-miR-186-3p  | HIP1    | 1     | 1          | 1          | 3   |
| hsa-miR-3175    | TFAP2B  | 1     | 1          | 1          | 3   |
| hsa-miR-6828-5p | GPATCH8 | 1     | 1          | 1          | 3   |
| hsa-miR-544b    | SCML2   | 1     | 1          | 1          | 3   |
| hsa-miR-6783-5p | GATAD2B | 1     | 1          | 1          | 3   |
| hsa-miR-670-5p  | ANAPC16 | 1     | 1          | 1          | 3   |
| hsa-miR-6825-6p | XPO7    | 1     | 1          | 1          | 3   |

|                 |          |   |   |   |   |
|-----------------|----------|---|---|---|---|
| hsa-miR-4161    | BTG3     | 1 | 1 | 1 | 3 |
| hsa-miR-3998    | CHIC2    | 1 | 1 | 1 | 3 |
| hsa-miR-4713-6p | ZCCHC25  | 1 | 1 | 1 | 3 |
| hsa-miR-6825-6p | LBX2     | 1 | 1 | 1 | 3 |
| hsa-miR-7160-6p | SUMF3    | 1 | 1 | 1 | 3 |
| hsa-miR-6825-6p | PHF9     | 1 | 1 | 1 | 3 |
| hsa-miR-6783-5p | USP45    | 1 | 1 | 1 | 3 |
| hsa-miR-4713-5p | SYNJ2BP  | 1 | 1 | 1 | 3 |
| hsa-miR-4324    | PTGS1    | 1 | 1 | 1 | 3 |
| hsa-miR-6825-5p | HDAC5    | 1 | 1 | 1 | 3 |
| hsa-miR-6828-5p | BAZ2A    | 1 | 1 | 1 | 3 |
| hsa-miR-6783-5p | VPS4A    | 1 | 1 | 1 | 3 |
| hsa-miR-194-3p  | AP1S1    | 1 | 1 | 1 | 3 |
| hsa-miR-6867-3p | APLN     | 1 | 1 | 1 | 3 |
| hsa-miR-7160-5p | RAB5B    | 1 | 1 | 1 | 3 |
| hsa-miR-6867-3p | TFAP2A   | 1 | 1 | 1 | 3 |
| hsa-miR-7160-5p | CRISPLD2 | 1 | 1 | 1 | 3 |
| hsa-miR-186-3p  | KIAA1549 | 1 | 1 | 1 | 3 |
| hsa-miR-3175    | RANBP10  | 1 | 1 | 1 | 3 |
| hsa-miR-3175    | FAM168A  | 1 | 1 | 1 | 3 |
| hsa-miR-5088-5p | AMOTL2   | 1 | 1 | 1 | 3 |
| hsa-miR-186-3p  | CACNB2   | 1 | 1 | 1 | 3 |
| hsa-miR-7106-5p | CIAPIN1  | 1 | 1 | 1 | 3 |
| hsa-miR-7106-5p | SALL2    | 1 | 1 | 1 | 3 |
| hsa-miR-7106-5p | PDE4A    | 1 | 1 | 1 | 3 |
| hsa-miR-6825-5p | RPP25    | 1 | 1 | 1 | 3 |
| hsa-miR-6845-3p | ZNF117   | 1 | 1 | 1 | 3 |
| hsa-miR-4487    | ZBTB18   | 1 | 1 | 1 | 3 |

|                 |          |   |   |   |   |
|-----------------|----------|---|---|---|---|
| hsa-miR-6825-5p | KCND1    | 1 | 1 | 1 | 3 |
| hsa-miR-671-5p  | NUP50    | 1 | 1 | 1 | 3 |
| hsa-miR-6854-5p | CREB3L2  | 1 | 1 | 1 | 3 |
| hsa-miR-6825-5p | MRPL18   | 1 | 1 | 1 | 3 |
| hsa-miR-7160-5p | TRAPPC2  | 1 | 1 | 1 | 3 |
| hsa-miR-1227-5p | NKX2-2   | 1 | 1 | 1 | 3 |
| hsa-miR-6828-5p | YWHAZ    | 1 | 1 | 1 | 3 |
| hsa-miR-6825-5p | LENG8    | 1 | 1 | 1 | 3 |
| hsa-miR-7113-3p | PPP1R37  | 1 | 1 | 1 | 3 |
| hsa-miR-4469    | AREL1    | 1 | 1 | 1 | 3 |
| hsa-miR-3175    | HOXC6    | 1 | 1 | 1 | 3 |
| hsa-miR-6799-5p | PLAGL2   | 1 | 1 | 1 | 3 |
| hsa-miR-7106-5p | YWHAE    | 1 | 1 | 1 | 3 |
| hsa-miR-6825-5p | IDS      | 1 | 1 | 1 | 3 |
| hsa-miR-7106-5p | SIX3     | 1 | 1 | 1 | 3 |
| hsa-miR-194-3p  | DLX2     | 1 | 1 | 1 | 3 |
| hsa-miR-186-3p  | ARID5B   | 1 | 1 | 1 | 3 |
| hsa-miR-7106-5p | IDS      | 1 | 1 | 1 | 3 |
| hsa-miR-4487    | LY6H     | 1 | 1 | 1 | 3 |
| hsa-miR-186-3p  | UBN2     | 1 | 1 | 1 | 3 |
| hsa-miR-6847-5p | MPDU1    | 1 | 1 | 1 | 3 |
| hsa-miR-6828-5p | KMT2D    | 1 | 1 | 1 | 3 |
| hsa-miR-6828-5p | C11orf24 | 1 | 1 | 1 | 3 |
| hsa-miR-7106-5p | RPH3A    | 1 | 1 | 1 | 3 |
| hsa-miR-6825-5p | ABL1     | 1 | 1 | 1 | 3 |
| hsa-miR-186-3p  | SOCS7    | 1 | 1 | 1 | 3 |
| hsa-miR-3175    | MYL12A   | 1 | 1 | 1 | 3 |
| hsa-miR-6825-5p | MOB3A    | 1 | 1 | 1 | 3 |

|                 |          |   |   |   |   |
|-----------------|----------|---|---|---|---|
| hsa-miR-7160-5p | LIX1L    | 1 | 1 | 1 | 3 |
| hsa-miR-3160-3p | TPM4     | 1 | 1 | 1 | 3 |
| hsa-miR-6845-3p | ATXN7    | 1 | 1 | 1 | 3 |
| hsa-miR-186-3p  | TNFSF15  | 1 | 1 | 1 | 3 |
| hsa-miR-27b-5p  | DDX55    | 1 | 1 | 1 | 3 |
| hsa-miR-3151-5p | SLC27A1  | 1 | 1 | 1 | 3 |
| hsa-miR-3918    | HOXA3    | 1 | 1 | 1 | 3 |
| hsa-miR-6825-5p | BTG2     | 1 | 1 | 1 | 3 |
| hsa-miR-4276    | NOTCH2NL | 1 | 1 | 1 | 3 |
| hsa-miR-4469    | TRIM66   | 1 | 1 | 1 | 3 |
| hsa-miR-3175    | DAZAP2   | 1 | 1 | 1 | 3 |
| hsa-miR-7106-5p | TRAF3IP2 | 1 | 1 | 1 | 3 |
| hsa-miR-7160-5p | SNX27    | 1 | 1 | 1 | 3 |
| hsa-miR-7106-5p | CSTF1    | 1 | 1 | 1 | 3 |
| hsa-miR-544b    | NUFIP2   | 1 | 1 | 1 | 3 |
| hsa-miR-4713-5p | AMOTL2   | 1 | 1 | 1 | 3 |
| hsa-miR-4469    | TECPR2   | 1 | 1 | 1 | 3 |
| hsa-miR-3158-3p | MAP3K9   | 1 | 1 | 1 | 3 |
| hsa-miR-4446-3p | PRELID1  | 1 | 1 | 1 | 3 |
| hsa-miR-4682    | TOR2A    | 1 | 1 | 1 | 3 |
| hsa-miR-6825-5p | CANX     | 1 | 1 | 1 | 3 |
| hsa-miR-5094    | UBN2     | 1 | 1 | 1 | 3 |
| hsa-miR-671-5p  | CTNNBIP1 | 1 | 1 | 1 | 3 |
| hsa-miR-760     | STEAP3   | 1 | 1 | 1 | 3 |
| hsa-miR-6825-5p | EPN1     | 1 | 1 | 1 | 3 |
| hsa-miR-4324    | SLC35G1  | 1 | 1 | 1 | 3 |
| hsa-miR-3175    | LIMD2    | 1 | 1 | 1 | 3 |
| hsa-miR-7106-5p | MLLT1    | 1 | 1 | 1 | 3 |

|                 |          |   |   |   |   |
|-----------------|----------|---|---|---|---|
| hsa-miR-5094    | FYTDD1   | 1 | 1 | 1 | 3 |
| hsa-miR-6828-5p | ATP1B3   | 1 | 1 | 1 | 3 |
| hsa-miR-1296-5p | KIF5B    | 1 | 1 | 1 | 3 |
| hsa-miR-6087    | TLN2     | 1 | 1 | 1 | 3 |
| hsa-miR-5094    | AAR2     | 1 | 1 | 1 | 3 |
| hsa-miR-18b-3p  | CTDSPL2  | 1 | 1 | 1 | 3 |
| hsa-miR-186-3p  | DUSP3    | 1 | 1 | 1 | 3 |
| hsa-miR-6799-5p | CRY2     | 1 | 1 | 1 | 3 |
| hsa-miR-7106-5p | PCYT1A   | 1 | 1 | 1 | 3 |
| hsa-miR-6796-3p | FAM91A1  | 1 | 1 | 1 | 3 |
| hsa-miR-27b-5p  | PER2     | 1 | 1 | 1 | 3 |
| hsa-miR-6825-5p | NRGN     | 1 | 1 | 1 | 3 |
| hsa-miR-6825-5p | SPATA6   | 1 | 1 | 1 | 3 |
| hsa-miR-6847-5p | M6PR     | 1 | 1 | 1 | 3 |
| hsa-miR-6825-5p | ZNF740   | 1 | 1 | 1 | 3 |
| hsa-miR-670-5p  | TOR2A    | 1 | 1 | 1 | 3 |
| hsa-miR-4324    | REST     | 1 | 1 | 1 | 3 |
| hsa-miR-4713-5p | ZNF48    | 1 | 1 | 1 | 3 |
| hsa-miR-6828-5p | DCAF17   | 1 | 1 | 1 | 3 |
| hsa-miR-7160-5p | STAT2    | 1 | 1 | 1 | 3 |
| hsa-miR-5094    | NOTCH2NL | 1 | 1 | 1 | 3 |
| hsa-miR-6870-3p | TBC1D25  | 1 | 1 | 1 | 3 |
| hsa-miR-671-5p  | HDAC1    | 1 | 1 | 1 | 3 |
| hsa-miR-3175    | RAPGEF1  | 1 | 1 | 1 | 3 |
| hsa-miR-1227-5p | WFIKKN2  | 1 | 1 | 1 | 3 |
| hsa-miR-6867-3p | CAPN15   | 1 | 1 | 1 | 3 |
| hsa-miR-4257    | C20orf27 | 1 | 1 | 1 | 3 |
| hsa-miR-6825-5p | NLGN2    | 1 | 1 | 1 | 3 |

|                 |           |   |   |   |   |
|-----------------|-----------|---|---|---|---|
| hsa-miR-6825-5p | GLG1      | 1 | 1 | 1 | 3 |
| hsa-miR-558     | HMGB2     | 1 | 1 | 1 | 3 |
| hsa-miR-4682    | KIF3B     | 1 | 1 | 1 | 3 |
| hsa-miR-296-5p  | GNB2      | 1 | 1 | 1 | 3 |
| hsa-miR-7160-5p | THSD4     | 1 | 1 | 1 | 3 |
| hsa-miR-4469    | ZNF644    | 1 | 1 | 1 | 3 |
| hsa-miR-4487    | RAB11FIP4 | 1 | 1 | 1 | 3 |
| hsa-miR-6851-3p | GTPBP2    | 1 | 1 | 1 | 3 |
| hsa-miR-760     | AKAP12    | 1 | 1 | 1 | 3 |
| hsa-miR-6799-5p | DDN       | 1 | 1 | 1 | 3 |
| hsa-miR-186-3p  | INO80D    | 1 | 1 | 1 | 3 |
| hsa-miR-7106-5p | SHISA6    | 1 | 1 | 1 | 3 |
| hsa-miR-6799-5p | RAB11FIP4 | 1 | 1 | 1 | 3 |
| hsa-miR-4732-3p | HMGCLL1   | 1 | 1 | 1 | 3 |
| hsa-miR-186-3p  | ATCAY     | 1 | 1 | 1 | 3 |
| hsa-miR-3151-5p | NACC2     | 1 | 1 | 1 | 3 |
| hsa-miR-6825-5p | COPS7B    | 1 | 1 | 1 | 3 |
| hsa-miR-4257    | NEDD4L    | 1 | 1 | 1 | 3 |
| hsa-miR-4512    | TSTD2     | 1 | 1 | 1 | 3 |
| hsa-miR-4487    | APIG1     | 1 | 1 | 1 | 3 |
| hsa-miR-6825-5p | USP22     | 1 | 1 | 1 | 3 |
| hsa-miR-491-5p  | GIT1      | 1 | 1 | 1 | 3 |
| hsa-miR-6828-5p | TRIM66    | 1 | 1 | 1 | 3 |
| hsa-miR-6847-5p | HSP90AA1  | 1 | 1 | 1 | 3 |
| hsa-miR-1227-5p | KDELRL1   | 1 | 1 | 1 | 3 |
| hsa-miR-7106-5p | TEX261    | 1 | 1 | 1 | 3 |
| hsa-miR-6799-5p | DNAJC24   | 1 | 1 | 1 | 3 |
| hsa-miR-4324    | BACH1     | 1 | 1 | 1 | 3 |

|                 |         |   |   |   |   |
|-----------------|---------|---|---|---|---|
| hsa-miR-6783-5p | LENG8   | 1 | 1 | 1 | 3 |
| hsa-miR-6825-5p | PHYHIP  | 1 | 1 | 1 | 3 |
| hsa-miR-6825-5p | KLK10   | 1 | 1 | 1 | 3 |
| hsa-miR-1296-3p | DYRK1B  | 1 | 1 | 1 | 3 |
| hsa-miR-3175    | CCL22   | 1 | 1 | 1 | 3 |
| hsa-miR-4324    | STK11IP | 1 | 1 | 1 | 3 |
| hsa-miR-6825-5p | ZBTB7B  | 1 | 1 | 1 | 3 |
| hsa-miR-4663    | KY      | 1 | 1 | 1 | 3 |
| hsa-miR-6825-5p | SHISA6  | 1 | 1 | 1 | 3 |
| hsa-miR-491-5p  | NFIB    | 1 | 1 | 1 | 3 |
| hsa-miR-1296-3p | GNB2    | 1 | 1 | 1 | 3 |
| hsa-miR-3918    | SURF4   | 1 | 1 | 1 | 3 |
| hsa-miR-7160-5p | BICD2   | 1 | 1 | 1 | 3 |
| hsa-miR-6825-5p | FAM83H  | 1 | 1 | 1 | 3 |
| hsa-miR-7160-5p | ZNF587  | 1 | 1 | 1 | 3 |
| hsa-miR-4469    | ZNF48   | 1 | 1 | 1 | 3 |
| hsa-miR-6783-5p | CALR    | 1 | 1 | 1 | 3 |
| hsa-miR-6845-3p | ZNF343  | 1 | 1 | 1 | 3 |
| hsa-miR-670-5p  | SH3BP5L | 1 | 1 | 1 | 3 |
| hsa-miR-6895-5p | FOXC1   | 1 | 1 | 1 | 3 |
| hsa-miR-6854-5p | HSPA4   | 1 | 1 | 1 | 3 |
| hsa-miR-3918    | ABT1    | 1 | 1 | 1 | 3 |
| hsa-miR-186-3p  | SPIB    | 1 | 1 | 1 | 3 |
| hsa-miR-7160-5p | AKNA    | 1 | 1 | 1 | 3 |
| hsa-miR-6783-5p | AP1S1   | 1 | 1 | 1 | 3 |
| hsa-miR-6783-5p | ZBTB33  | 1 | 1 | 1 | 3 |
| hsa-miR-7106-5p | ASB1    | 1 | 1 | 1 | 3 |
| hsa-miR-4469    | CAPN15  | 1 | 1 | 1 | 3 |

|                 |          |   |   |   |   |
|-----------------|----------|---|---|---|---|
| hsa-miR-6847-5p | PLA2G5   | 1 | 1 | 1 | 3 |
| hsa-miR-7106-5p | SLC2A4   | 1 | 1 | 1 | 3 |
| hsa-miR-3160-3p | LUZP1    | 1 | 1 | 1 | 3 |
| hsa-miR-3918    | SGPL1    | 1 | 1 | 1 | 3 |
| hsa-miR-4257    | NAT8L    | 1 | 1 | 1 | 3 |
| hsa-miR-4713-5p | PERP     | 1 | 1 | 1 | 3 |
| hsa-miR-6742-5p | RNPS1    | 1 | 1 | 1 | 3 |
| hsa-miR-6783-5p | ATXN7L3B | 1 | 1 | 1 | 3 |
| hsa-miR-3918    | SAMD4B   | 1 | 1 | 1 | 3 |
| hsa-miR-7160-5p | ELMSAN1  | 1 | 1 | 1 | 3 |
| hsa-miR-146b-3p | BLCAP    | 1 | 1 | 1 | 3 |
| hsa-miR-7106-5p | CRTC2    | 1 | 1 | 1 | 3 |
| hsa-miR-7160-5p | TBXA2R   | 1 | 1 | 1 | 3 |
| hsa-miR-4732-3p | ZNF25    | 1 | 1 | 1 | 3 |
| hsa-miR-8077    | CHD9     | 1 | 1 | 1 | 3 |
| hsa-miR-6742-5p | ELN      | 1 | 1 | 1 | 3 |
| hsa-miR-670-5p  | PPP1R37  | 1 | 1 | 1 | 3 |
| hsa-miR-671-5p  | PODXL    | 1 | 1 | 1 | 3 |
| hsa-miR-6783-5p | THRAP3   | 1 | 1 | 1 | 3 |
| hsa-miR-6783-5p | ZCCHC3   | 1 | 1 | 1 | 3 |
| hsa-miR-6828-5p | AGO4     | 1 | 1 | 1 | 3 |
| hsa-miR-186-3p  | FOXO1    | 1 | 1 | 1 | 3 |
| hsa-miR-7160-5p | NR2F6    | 1 | 1 | 1 | 3 |
| hsa-miR-671-5p  | CDK2AP2  | 1 | 1 | 1 | 3 |
| hsa-miR-6828-5p | SYPL1    | 1 | 1 | 1 | 3 |
| hsa-miR-6825-5p | NEUROD2  | 1 | 1 | 1 | 3 |
| hsa-miR-5693    | TMEM192  | 1 | 1 | 1 | 3 |
| hsa-miR-6825-5p | PGPEP1   | 1 | 1 | 1 | 3 |

|                 |         |   |   |   |   |
|-----------------|---------|---|---|---|---|
| hsa-miR-7160-5p | HNRNPU  | 1 | 1 | 1 | 3 |
| hsa-miR-4469    | RAB13   | 1 | 1 | 1 | 3 |
| hsa-miR-4276    | RAB31   | 1 | 1 | 1 | 3 |
| hsa-miR-6854-5p | TMEM81  | 1 | 1 | 1 | 3 |
| hsa-miR-6825-5p | MKNK2   | 1 | 1 | 1 | 3 |
| hsa-miR-6825-5p | PACSIN1 | 1 | 1 | 1 | 3 |
| hsa-miR-544b    | TGFBR2  | 1 | 1 | 1 | 3 |
| hsa-miR-6825-5p | DYRK1B  | 1 | 1 | 1 | 3 |
| hsa-miR-7160-5p | DSTN    | 1 | 1 | 1 | 3 |
| hsa-miR-7106-5p | PDE7B   | 1 | 1 | 1 | 3 |
| hsa-miR-6825-5p | USB1    | 1 | 1 | 1 | 3 |
| hsa-miR-6825-5p | CHST11  | 1 | 1 | 1 | 3 |
| hsa-miR-5094    | YWHAB   | 1 | 1 | 1 | 3 |
| hsa-miR-6867-3p | SMG7    | 1 | 1 | 1 | 3 |
| hsa-miR-7106-5p | TRIM66  | 1 | 1 | 1 | 3 |
| hsa-miR-7160-5p | TFDP2   | 1 | 1 | 1 | 3 |
| hsa-miR-760     | HYOU1   | 1 | 1 | 1 | 3 |
| hsa-miR-194-3p  | POLR2D  | 1 | 1 | 1 | 3 |
| hsa-miR-671-5p  | 3-Sep   | 1 | 1 | 1 | 3 |
| hsa-miR-6828-5p | CCDC6   | 1 | 1 | 1 | 3 |
| hsa-miR-6825-5p | NAV2    | 1 | 1 | 1 | 3 |
| hsa-miR-146b-3p | KCTD21  | 1 | 1 | 1 | 3 |
| hsa-miR-491-5p  | PEG10   | 1 | 1 | 1 | 3 |
| hsa-miR-8077    | ARF1    | 1 | 1 | 1 | 3 |
| hsa-miR-4257    | ACER2   | 1 | 1 | 1 | 3 |
| hsa-miR-6508-3p | SFPQ    | 1 | 1 | 1 | 3 |
| hsa-miR-296-5p  | MTSS1L  | 1 | 1 | 1 | 3 |
| hsa-miR-6845-3p | SLC43A2 | 1 | 1 | 1 | 3 |

|                 |           |   |   |   |   |
|-----------------|-----------|---|---|---|---|
| hsa-miR-6825-5p | DLGAP3    | 1 | 1 | 1 | 3 |
| hsa-miR-1296-5p | TBC1D25   | 1 | 1 | 1 | 3 |
| hsa-miR-6845-3p | BCL2L2    | 1 | 1 | 1 | 3 |
| hsa-miR-491-5p  | ELN       | 1 | 1 | 1 | 3 |
| hsa-miR-7106-5p | RNF157    | 1 | 1 | 1 | 3 |
| hsa-miR-3160-3p | RNF13     | 1 | 1 | 1 | 3 |
| hsa-miR-7160-3p | GNG3      | 1 | 1 | 1 | 3 |
| hsa-miR-5693    | DNAJC3    | 1 | 1 | 1 | 3 |
| hsa-miR-6825-5p | STK35     | 1 | 1 | 1 | 3 |
| hsa-miR-670-5p  | SP1       | 1 | 1 | 1 | 3 |
| hsa-miR-670-5p  | STX6      | 1 | 1 | 1 | 3 |
| hsa-miR-6825-5p | NFASC     | 1 | 1 | 1 | 3 |
| hsa-miR-27b-5p  | POLI      | 1 | 1 | 1 | 3 |
| hsa-miR-6825-5p | CASZ1     | 1 | 1 | 1 | 3 |
| hsa-miR-6828-5p | DLC1      | 1 | 1 | 1 | 3 |
| hsa-miR-6825-5p | SORCS2    | 1 | 1 | 1 | 3 |
| hsa-miR-6867-3p | STC2      | 1 | 1 | 1 | 3 |
| hsa-miR-6825-5p | KBTBD3    | 1 | 1 | 1 | 3 |
| hsa-miR-3175    | UBTF      | 1 | 1 | 1 | 3 |
| hsa-miR-4732-3p | MON1B     | 1 | 1 | 1 | 3 |
| hsa-miR-7113-3p | SPN       | 1 | 1 | 1 | 3 |
| hsa-miR-6825-5p | BCAM      | 1 | 1 | 1 | 3 |
| hsa-miR-6825-5p | YWHAZ     | 1 | 1 | 1 | 3 |
| hsa-miR-6867-3p | STMN1     | 1 | 1 | 1 | 3 |
| hsa-miR-7113-3p | KCNQ3     | 1 | 1 | 1 | 3 |
| hsa-miR-6828-5p | GABARAPL1 | 1 | 1 | 1 | 3 |
| hsa-miR-296-5p  | CHCHD4    | 1 | 1 | 1 | 3 |
| hsa-miR-7106-5p | PACSIN1   | 1 | 1 | 1 | 3 |

|                 |         |   |   |   |   |
|-----------------|---------|---|---|---|---|
| hsa-miR-4257    | COX10   | 1 | 1 | 1 | 3 |
| hsa-miR-3175    | FOXC1   | 1 | 1 | 1 | 3 |
| hsa-miR-4469    | FKRP    | 1 | 1 | 1 | 3 |
| hsa-miR-6825-5p | PFN1    | 1 | 1 | 1 | 3 |
| hsa-miR-760     | GOLGA7  | 1 | 1 | 1 | 3 |
| hsa-miR-6825-5p | SLITRK5 | 1 | 1 | 1 | 3 |
| hsa-miR-27b-5p  | MED13   | 1 | 1 | 1 | 3 |
| hsa-miR-558     | GBP4    | 1 | 1 | 1 | 3 |
| hsa-miR-7106-5p | GLYR1   | 1 | 1 | 1 | 3 |
| hsa-miR-6825-5p | URM1    | 1 | 1 | 1 | 3 |
| hsa-miR-6799-5p | PGM2L1  | 1 | 1 | 1 | 3 |
| hsa-miR-4276    | FYTDD1  | 1 | 1 | 1 | 3 |
| hsa-miR-670-5p  | UBR7    | 1 | 1 | 1 | 3 |
| hsa-miR-127-5p  | HMGB2   | 1 | 1 | 1 | 3 |
| hsa-miR-6845-3p | HNRNPA3 | 1 | 1 | 1 | 3 |
| hsa-miR-6783-5p | TREML2  | 1 | 1 | 1 | 3 |
| hsa-miR-8077    | WEE1    | 1 | 1 | 1 | 3 |
| hsa-miR-4469    | MACROD2 | 1 | 1 | 1 | 3 |
| hsa-miR-6783-5p | TMEM55B | 1 | 1 | 1 | 3 |
| hsa-miR-6825-5p | NOS1AP  | 1 | 1 | 1 | 3 |
| hsa-miR-544b    | GGA2    | 1 | 1 | 1 | 3 |
| hsa-miR-4276    | JARID2  | 1 | 1 | 1 | 3 |
| hsa-miR-6825-5p | NACC2   | 1 | 1 | 1 | 3 |
| hsa-miR-6825-5p | MGAT5B  | 1 | 1 | 1 | 3 |
| hsa-miR-6828-5p | TBC1D13 | 1 | 1 | 1 | 3 |
| hsa-miR-6783-5p | PRRC2A  | 1 | 1 | 1 | 3 |
| hsa-miR-6825-5p | NXN     | 1 | 1 | 1 | 3 |
| hsa-miR-7106-5p | NAV2    | 1 | 1 | 1 | 3 |

|                 |          |   |   |   |   |
|-----------------|----------|---|---|---|---|
| hsa-miR-6799-5p | ZNF548   | 1 | 1 | 1 | 3 |
| hsa-miR-6867-3p | ZDHHC22  | 1 | 1 | 1 | 3 |
| hsa-miR-6742-5p | SETBP1   | 1 | 1 | 1 | 3 |
| hsa-miR-4276    | ZNF805   | 1 | 1 | 1 | 3 |
| hsa-miR-6828-5p | OGT      | 1 | 1 | 1 | 3 |
| hsa-miR-4446-3p | ZNF704   | 1 | 1 | 1 | 3 |
| hsa-miR-4324    | KLF13    | 1 | 1 | 1 | 3 |
| hsa-miR-4276    | DNAJC8   | 1 | 1 | 1 | 3 |
| hsa-miR-7106-5p | SNX1     | 1 | 1 | 1 | 3 |
| hsa-miR-6825-5p | CALML3   | 1 | 1 | 1 | 3 |
| hsa-miR-7106-5p | C11orf54 | 1 | 1 | 1 | 3 |
| hsa-miR-6799-5p | RTKN     | 1 | 1 | 1 | 3 |
| hsa-miR-558     | KCTD10   | 1 | 1 | 1 | 3 |
| hsa-miR-4469    | EMX2     | 1 | 1 | 1 | 3 |
| hsa-miR-6825-5p | ANKRD45  | 1 | 1 | 1 | 3 |
| hsa-miR-7106-5p | COPS7B   | 1 | 1 | 1 | 3 |
| hsa-miR-4276    | HS3ST1   | 1 | 1 | 1 | 3 |
| hsa-miR-146b-3p | MTFR1L   | 1 | 1 | 1 | 3 |
| hsa-miR-7106-5p | ATF6     | 1 | 1 | 1 | 3 |
| hsa-miR-3175    | C5orf24  | 1 | 1 | 1 | 3 |
| hsa-miR-6825-5p | CSNK1G2  | 1 | 1 | 1 | 3 |
| hsa-miR-491-5p  | TAF10    | 1 | 1 | 1 | 3 |
| hsa-miR-186-3p  | ZNF462   | 1 | 1 | 1 | 3 |
| hsa-miR-760     | HIP1     | 1 | 1 | 1 | 3 |
| hsa-miR-3175    | ZNF740   | 1 | 1 | 1 | 3 |
| hsa-miR-3175    | RAB11B   | 1 | 1 | 1 | 3 |
| hsa-miR-6825-5p | THY1     | 1 | 1 | 1 | 3 |
| hsa-miR-5088-5p | TCF21    | 1 | 1 | 1 | 3 |

|                 |          |   |   |   |   |
|-----------------|----------|---|---|---|---|
| hsa-miR-6845-3p | PALM     | 1 | 1 | 1 | 3 |
| hsa-miR-3918    | RNF44    | 1 | 1 | 1 | 3 |
| hsa-miR-186-3p  | FBXL17   | 1 | 1 | 1 | 3 |
| hsa-miR-3160-3p | HSPA1B   | 1 | 1 | 1 | 3 |
| hsa-miR-6825-5p | EVC      | 1 | 1 | 1 | 3 |
| hsa-miR-6825-5p | HCFC1    | 1 | 1 | 1 | 3 |
| hsa-miR-4324    | LEFTY1   | 1 | 1 | 1 | 3 |
| hsa-miR-5693    | RAP1GDS1 | 1 | 1 | 1 | 3 |
| hsa-miR-1227-5p | DNMBP    | 1 | 1 | 1 | 3 |
| hsa-miR-7106-5p | SORCS2   | 1 | 1 | 1 | 3 |
| hsa-miR-4446-3p | ZBTB39   | 1 | 1 | 1 | 3 |
| hsa-miR-7113-3p | KCNJ11   | 1 | 1 | 1 | 3 |
| hsa-miR-7160-5p | PPEF2    | 1 | 1 | 1 | 3 |
| hsa-miR-4512    | FAM98A   | 1 | 1 | 1 | 3 |
| hsa-miR-7160-5p | ABHD15   | 1 | 1 | 1 | 3 |
| hsa-miR-760     | KIAA1191 | 1 | 1 | 1 | 3 |
| hsa-miR-7106-5p | PFKFB3   | 1 | 1 | 1 | 3 |
| hsa-miR-7106-5p | IRAK3    | 1 | 1 | 1 | 3 |
| hsa-miR-6799-5p | GCFC2    | 1 | 1 | 1 | 3 |
| hsa-miR-1296-5p | SFPQ     | 1 | 1 | 1 | 3 |
| hsa-miR-670-5p  | EHD1     | 1 | 1 | 1 | 3 |
| hsa-miR-7106-5p | RPP30    | 1 | 1 | 1 | 3 |
| hsa-miR-6799-5p | DHDDS    | 1 | 1 | 1 | 3 |
| hsa-miR-491-5p  | PPP1R9B  | 1 | 1 | 1 | 3 |
| hsa-miR-6799-5p | DPH2     | 1 | 1 | 1 | 3 |
| hsa-miR-6825-5p | NLRP2    | 1 | 1 | 1 | 3 |
| hsa-miR-6847-5p | CCND2    | 1 | 1 | 1 | 3 |
| hsa-miR-7106-5p | NACC2    | 1 | 1 | 1 | 3 |

|                 |          |   |   |   |   |
|-----------------|----------|---|---|---|---|
| hsa-miR-146b-3p | TSC22D2  | 1 | 1 | 1 | 3 |
| hsa-miR-4732-3p | PRICKLE1 | 1 | 1 | 1 | 3 |
| hsa-miR-6825-5p | SALL2    | 1 | 1 | 1 | 3 |
| hsa-miR-6845-3p | NACC1    | 1 | 1 | 1 | 3 |
| hsa-miR-6825-5p | GPHA2    | 1 | 1 | 1 | 3 |
| hsa-miR-6799-5p | LRRC20   | 1 | 1 | 1 | 3 |
| hsa-miR-3160-3p | PNO1     | 1 | 1 | 1 | 3 |
| hsa-miR-3175    | BARHL1   | 1 | 1 | 1 | 3 |
| hsa-miR-6847-3p | UBL3     | 1 | 1 | 1 | 3 |
| hsa-miR-6783-5p | UBE4B    | 1 | 1 | 1 | 3 |
| hsa-miR-3151-5p | COPZ1    | 1 | 1 | 1 | 3 |
| hsa-miR-6783-5p | RAB7A    | 1 | 1 | 1 | 3 |
| hsa-miR-4437    | MGST3    | 1 | 1 | 1 | 3 |
| hsa-miR-6825-5p | KIAA1161 | 1 | 1 | 1 | 3 |
| hsa-miR-6828-5p | NR4A3    | 1 | 1 | 1 | 3 |
| hsa-miR-7160-5p | NUP210   | 1 | 1 | 1 | 3 |
| hsa-miR-7160-5p | SYT15    | 1 | 1 | 1 | 3 |
| hsa-miR-491-5p  | SHISA6   | 1 | 1 | 1 | 3 |
| hsa-miR-544b    | PIP5K1A  | 1 | 1 | 1 | 3 |
| hsa-miR-6867-3p | SPIB     | 1 | 1 | 1 | 3 |
| hsa-miR-6854-5p | KIF21B   | 1 | 1 | 1 | 3 |
| hsa-miR-7160-5p | UTP15    | 1 | 1 | 1 | 3 |
| hsa-miR-7106-5p | NXN      | 1 | 1 | 1 | 3 |
| hsa-miR-544b    | ZBTB7A   | 1 | 1 | 1 | 3 |
| hsa-miR-491-5p  | RNF11    | 1 | 1 | 1 | 3 |
| hsa-miR-7160-5p | OLFML2A  | 1 | 1 | 1 | 3 |
| hsa-miR-4467    | BRSK2    | 1 | 1 | 1 | 3 |
| hsa-miR-6847-5p | C7orf55- | 1 | 1 | 1 | 3 |

|                 |         |   |   |   |   |
|-----------------|---------|---|---|---|---|
| hsa-miR-7106-5p | UBXN2B  | 1 | 1 | 1 | 3 |
| hsa-miR-7106-5p | CANX    | 1 | 1 | 1 | 3 |
| hsa-miR-6825-5p | YWHAE   | 1 | 1 | 1 | 3 |
| hsa-miR-7160-5p | ZNF585B | 1 | 1 | 1 | 3 |
| hsa-miR-6845-3p | TRUB1   | 1 | 1 | 1 | 3 |
| hsa-miR-1227-5p | RHOA    | 1 | 1 | 1 | 3 |
| hsa-miR-296-5p  | KCTD12  | 1 | 1 | 1 | 3 |
| hsa-miR-6825-5p | C5orf38 | 1 | 1 | 1 | 3 |
| hsa-miR-671-5p  | HRH2    | 1 | 1 | 1 | 3 |
| hsa-miR-6828-5p | STAC    | 1 | 1 | 1 | 3 |
| hsa-miR-5094    | PDIK1L  | 1 | 1 | 1 | 3 |
| hsa-miR-186-3p  | ATAD2B  | 1 | 1 | 1 | 3 |
| hsa-miR-6847-5p | PHF19   | 1 | 1 | 1 | 3 |
| hsa-miR-1227-5p | RBM23   | 1 | 1 | 1 | 3 |
| hsa-miR-4682    | CHD9    | 1 | 1 | 1 | 3 |
| hsa-miR-6825-5p | HIRIP3  | 1 | 1 | 1 | 3 |
| hsa-miR-1296-3p | PHYHIP  | 1 | 1 | 1 | 3 |
| hsa-miR-6742-5p | MGAT5   | 1 | 1 | 1 | 3 |
| hsa-miR-4713-5p | FRAT2   | 1 | 1 | 1 | 3 |
| hsa-miR-558     | ZCCHC3  | 1 | 1 | 1 | 3 |
| hsa-miR-6895-5p | SFPQ    | 1 | 1 | 1 | 3 |
| hsa-miR-7160-5p | UQCRQ   | 1 | 1 | 1 | 3 |
| hsa-miR-7106-5p | ZNF451  | 1 | 1 | 1 | 3 |
| hsa-miR-544b    | KLF13   | 1 | 1 | 1 | 3 |
| hsa-miR-194-3p  | TBC1D2B | 1 | 1 | 1 | 3 |
| hsa-miR-186-3p  | KIF2C   | 1 | 1 | 1 | 3 |
| hsa-miR-4487    | TMEM2   | 1 | 1 | 1 | 3 |
| hsa-miR-6783-5p | MINK1   | 1 | 1 | 1 | 3 |

|                 |          |   |   |   |   |
|-----------------|----------|---|---|---|---|
| hsa-miR-491-5p  | FGFR4    | 1 | 1 | 1 | 3 |
| hsa-miR-5693    | CPSF2    | 1 | 1 | 1 | 3 |
| hsa-miR-671-5p  | TAF8     | 1 | 1 | 1 | 3 |
| hsa-miR-6825-5p | RPS6KA2  | 1 | 1 | 1 | 3 |
| hsa-miR-7106-5p | FKBP5    | 1 | 1 | 1 | 3 |
| hsa-miR-6847-3p | RHOBTB3  | 1 | 1 | 1 | 3 |
| hsa-miR-7106-5p | PRELP    | 1 | 1 | 1 | 3 |
| hsa-miR-6895-5p | TNFAIP1  | 1 | 1 | 1 | 3 |
| hsa-miR-671-5p  | SLC7A1   | 1 | 1 | 1 | 3 |
| hsa-miR-4732-3p | PLXDC1   | 1 | 1 | 1 | 3 |
| hsa-miR-6828-5p | ZMYND11  | 1 | 1 | 1 | 3 |
| hsa-miR-4276    | SESN3    | 1 | 1 | 1 | 3 |
| hsa-miR-7106-5p | GCNT4    | 1 | 1 | 1 | 3 |
| hsa-miR-6825-5p | PDE4A    | 1 | 1 | 1 | 3 |
| hsa-miR-6870-3p | SURF4    | 1 | 1 | 1 | 3 |
| hsa-miR-7160-5p | LRRC47   | 1 | 1 | 1 | 3 |
| hsa-miR-4487    | CRTC3    | 1 | 1 | 1 | 3 |
| hsa-miR-6825-5p | IER5     | 1 | 1 | 1 | 3 |
| hsa-miR-4469    | TBC1D13  | 1 | 1 | 1 | 3 |
| hsa-miR-4276    | RBMS2    | 1 | 1 | 1 | 3 |
| hsa-miR-7106-5p | TOR1AIP2 | 1 | 1 | 1 | 3 |
| hsa-miR-4257    | CEP135   | 1 | 1 | 1 | 3 |
| hsa-miR-6742-5p | SPRY4    | 1 | 1 | 1 | 3 |
| hsa-miR-6828-5p | PLAGL2   | 1 | 1 | 1 | 3 |
| hsa-miR-3918    | ATG7     | 1 | 1 | 1 | 3 |
| hsa-miR-4487    | CDKN1A   | 1 | 1 | 1 | 3 |
| hsa-miR-8077    | NCOA4    | 1 | 1 | 1 | 3 |
| hsa-miR-4713-5p | MBD6     | 1 | 1 | 1 | 3 |

|                 |         |   |   |   |   |
|-----------------|---------|---|---|---|---|
| hsa-miR-7160-5p | PGPEP1  | 1 | 1 | 1 | 3 |
| hsa-miR-5693    | PEX2    | 1 | 1 | 1 | 3 |
| hsa-miR-6825-5p | PRR12   | 1 | 1 | 1 | 3 |
| hsa-miR-5693    | NCMAP   | 1 | 1 | 1 | 3 |
| hsa-miR-6783-5p | RNF41   | 1 | 1 | 1 | 3 |
| hsa-miR-6825-5p | GPR173  | 1 | 1 | 1 | 3 |
| hsa-miR-7106-5p | GLG1    | 1 | 1 | 1 | 3 |
| hsa-miR-4257    | PDP2    | 1 | 1 | 1 | 3 |
| hsa-miR-6828-5p | ZBTB4   | 1 | 1 | 1 | 3 |
| hsa-miR-6867-3p | ZNF644  | 1 | 1 | 1 | 3 |
| hsa-miR-7106-5p | XKR4    | 1 | 1 | 1 | 3 |
| hsa-miR-296-5p  | ZDHHC8  | 1 | 1 | 1 | 3 |
| hsa-miR-4512    | DDX3X   | 1 | 1 | 1 | 3 |
| hsa-miR-4446-3p | RHOA    | 1 | 1 | 1 | 3 |
| hsa-miR-4276    | UBN2    | 1 | 1 | 1 | 3 |
| hsa-miR-5693    | SH3BP2  | 1 | 1 | 1 | 3 |
| hsa-miR-6847-5p | ZBTB4   | 1 | 1 | 1 | 3 |
| hsa-miR-4469    | MYOCD   | 1 | 1 | 1 | 3 |
| hsa-miR-6799-5p | ZNF70   | 1 | 1 | 1 | 3 |
| hsa-miR-6783-5p | OLR1    | 1 | 1 | 1 | 3 |
| hsa-miR-6828-5p | BCL2L13 | 1 | 1 | 1 | 3 |
| hsa-miR-1227-5p | EPHA2   | 1 | 1 | 1 | 3 |
| hsa-miR-4487    | RNPS1   | 1 | 1 | 1 | 3 |
| hsa-miR-7106-5p | HCFC1   | 1 | 1 | 1 | 3 |
| hsa-miR-6825-5p | ITGA3   | 1 | 1 | 1 | 3 |
| hsa-miR-7160-5p | ZNF417  | 1 | 1 | 1 | 3 |
| hsa-miR-4276    | RCAN1   | 1 | 1 | 1 | 3 |
| hsa-miR-4469    | GPR107  | 1 | 1 | 1 | 3 |

|                 |          |   |   |   |   |
|-----------------|----------|---|---|---|---|
| hsa-miR-671-5p  | ACY1     | 1 | 1 | 1 | 3 |
| hsa-miR-4257    | HMGA2    | 1 | 1 | 1 | 3 |
| hsa-miR-491-5p  | FIBCD1   | 1 | 1 | 1 | 3 |
| hsa-miR-4663    | TMEM105  | 1 | 1 | 1 | 3 |
| hsa-miR-4713-5p | GAN      | 1 | 1 | 1 | 3 |
| hsa-miR-7160-5p | PPP1R15B | 1 | 1 | 1 | 3 |
| hsa-miR-6845-3p | CPXM2    | 1 | 1 | 1 | 3 |
| hsa-miR-6825-5p | CST9     | 1 | 1 | 1 | 3 |
| hsa-miR-6828-5p | ABT1     | 1 | 1 | 1 | 3 |
| hsa-miR-542-5p  | TBR1     | 1 | 1 | 1 | 3 |
| hsa-miR-6783-5p | TPST2    | 1 | 1 | 1 | 3 |
| hsa-miR-6825-5p | EPB41L1  | 1 | 1 | 1 | 3 |
| hsa-miR-186-3p  | UBE4B    | 1 | 1 | 1 | 3 |
| hsa-miR-5088-5p | ZBTB39   | 1 | 1 | 1 | 3 |
| hsa-miR-6825-5p | CBS      | 1 | 1 | 1 | 3 |
| hsa-miR-3151-5p | CACNA2D2 | 1 | 1 | 1 | 3 |
| hsa-miR-7106-5p | EFNA3    | 1 | 1 | 1 | 3 |
| hsa-miR-7160-5p | CDKAL1   | 1 | 1 | 1 | 3 |
| hsa-miR-6895-5p | SAMD4B   | 1 | 1 | 1 | 3 |
| hsa-miR-6867-3p | ANTXR2   | 1 | 1 | 1 | 3 |
| hsa-miR-6845-3p | GATM     | 1 | 1 | 1 | 3 |
| hsa-miR-7160-5p | MED13    | 1 | 1 | 1 | 3 |
| hsa-miR-3175    | MSN      | 1 | 1 | 1 | 3 |
| hsa-miR-671-5p  | CPNE2    | 1 | 1 | 1 | 3 |
| hsa-miR-6867-3p | EMX2     | 1 | 1 | 1 | 3 |
| hsa-miR-4487    | CCDC25   | 1 | 1 | 1 | 3 |
| hsa-miR-6847-5p | AMOTL2   | 1 | 1 | 1 | 3 |
| hsa-miR-491-5p  | ZNF703   | 1 | 1 | 1 | 3 |

|                 |         |   |   |   |   |
|-----------------|---------|---|---|---|---|
| hsa-miR-1296-3p | SLC38A2 | 1 | 1 | 1 | 3 |
| hsa-miR-671-5p  | DCAF17  | 1 | 1 | 1 | 3 |
| hsa-miR-7160-5p | ITM2C   | 1 | 1 | 1 | 3 |
| hsa-miR-3175    | SLC26A9 | 1 | 1 | 1 | 3 |
| hsa-miR-670-5p  | FAM174B | 1 | 1 | 1 | 3 |
| hsa-miR-7113-3p | IQCE    | 1 | 1 | 1 | 3 |
| hsa-miR-7160-5p | RPS6KA5 | 1 | 1 | 1 | 3 |
| hsa-miR-7106-5p | PLAGL2  | 1 | 1 | 1 | 3 |
| hsa-miR-4437    | STEAP3  | 1 | 1 | 1 | 3 |
| hsa-miR-4469    | KCNA7   | 1 | 1 | 1 | 3 |
| hsa-miR-491-5p  | MIER3   | 1 | 1 | 1 | 3 |
| hsa-miR-3175    | HIC1    | 1 | 1 | 1 | 3 |
| hsa-miR-4469    | MACC1   | 1 | 1 | 1 | 3 |
| hsa-miR-6799-5p | EPN1    | 1 | 1 | 1 | 3 |
| hsa-miR-3175    | LPCAT3  | 1 | 1 | 1 | 3 |
| hsa-miR-6825-5p | ANKRD52 | 1 | 1 | 1 | 3 |
| hsa-miR-6867-3p | MEX3A   | 1 | 1 | 1 | 3 |
| hsa-miR-7106-5p | ADD2    | 1 | 1 | 1 | 3 |
| hsa-miR-671-5p  | YPEL2   | 1 | 1 | 1 | 3 |
| hsa-miR-7160-5p | CLIC5   | 1 | 1 | 1 | 3 |
| hsa-miR-4324    | FEN1    | 1 | 1 | 1 | 3 |
| hsa-miR-1227-5p | SLC39A1 | 1 | 1 | 1 | 3 |
| hsa-miR-491-5p  | SHOC2   | 1 | 1 | 1 | 3 |
| hsa-miR-6854-5p | TGOLN2  | 1 | 1 | 1 | 3 |
| hsa-miR-6742-5p | MAZ     | 1 | 1 | 1 | 3 |
| hsa-miR-1296-3p | LAMC1   | 1 | 1 | 1 | 3 |
| hsa-miR-6825-5p | CCL22   | 1 | 1 | 1 | 3 |
| hsa-miR-7160-3p | FAM83F  | 1 | 1 | 1 | 3 |

|                 |           |   |   |   |   |
|-----------------|-----------|---|---|---|---|
| hsa-miR-6742-5p | PEG10     | 1 | 1 | 1 | 3 |
| hsa-miR-7113-3p | MBOAT1    | 1 | 1 | 1 | 3 |
| hsa-miR-671-5p  | ACTR2     | 1 | 1 | 1 | 3 |
| hsa-miR-7160-3p | RNF44     | 1 | 1 | 1 | 3 |
| hsa-miR-3175    | PPM1L     | 1 | 1 | 1 | 3 |
| hsa-miR-186-3p  | CDK1      | 1 | 1 | 1 | 3 |
| hsa-miR-4732-3p | KSR2      | 1 | 1 | 1 | 3 |
| hsa-miR-7106-5p | SCAMP4    | 1 | 1 | 1 | 3 |
| hsa-miR-6847-5p | SDC2      | 1 | 1 | 1 | 3 |
| hsa-miR-7106-5p | MAPK1IP1L | 1 | 1 | 1 | 3 |
| hsa-miR-7106-5p | OPA3      | 1 | 1 | 1 | 3 |
| hsa-miR-6825-5p | RAP1GAP2  | 1 | 1 | 1 | 3 |
| hsa-miR-7160-5p | ZNF623    | 1 | 1 | 1 | 3 |
| hsa-miR-5088-5p | LGALS1    | 1 | 1 | 1 | 3 |
| hsa-miR-3918    | OLFML2A   | 1 | 1 | 1 | 3 |
| hsa-miR-1296-3p | PADI1     | 1 | 1 | 1 | 3 |
| hsa-miR-146b-3p | CPEB4     | 1 | 1 | 1 | 3 |
| hsa-miR-4487    | NFASC     | 1 | 1 | 1 | 3 |
| hsa-miR-558     | CDKN1A    | 1 | 1 | 1 | 3 |
| hsa-miR-6845-3p | ARL8A     | 1 | 1 | 1 | 3 |
| hsa-miR-6825-5p | SAP18     | 1 | 1 | 1 | 3 |
| hsa-miR-4257    | HMGA1     | 1 | 1 | 1 | 3 |
| hsa-miR-3151-5p | WNT16     | 1 | 1 | 1 | 3 |
| hsa-miR-7106-5p | ACVR1B    | 1 | 1 | 1 | 3 |
| hsa-miR-4437    | SNCG      | 1 | 1 | 1 | 3 |
| hsa-miR-4257    | CNNM4     | 1 | 1 | 1 | 3 |
| hsa-miR-4512    | ACER2     | 1 | 1 | 1 | 3 |
| hsa-miR-194-3p  | PRR12     | 1 | 1 | 1 | 3 |

|                 |         |   |   |   |   |
|-----------------|---------|---|---|---|---|
| hsa-miR-7160-3p | NETO2   | 1 | 1 | 1 | 3 |
| hsa-miR-186-3p  | TBL1XR1 | 1 | 1 | 1 | 3 |
| hsa-miR-491-5p  | TP53    | 1 | 1 | 1 | 3 |
| hsa-miR-3175    | CARD10  | 1 | 1 | 1 | 3 |
| hsa-miR-6825-5p | SREBF2  | 1 | 1 | 1 | 3 |
| hsa-miR-6825-5p | CLSTN1  | 1 | 1 | 1 | 3 |
| hsa-miR-6847-5p | HMGA1   | 1 | 1 | 1 | 3 |
| hsa-miR-186-3p  | SMIM7   | 1 | 1 | 1 | 3 |
| hsa-miR-6847-5p | FABP3   | 1 | 1 | 1 | 3 |
| hsa-miR-7106-5p | RRP7A   | 1 | 1 | 1 | 3 |
| hsa-miR-4276    | LSM14A  | 1 | 1 | 1 | 3 |
| hsa-miR-4324    | H2AFZ   | 1 | 1 | 1 | 3 |
| hsa-miR-6825-5p | TULP1   | 1 | 1 | 1 | 3 |
| hsa-miR-6828-5p | FOXO3   | 1 | 1 | 1 | 3 |
| hsa-miR-6825-5p | HIC2    | 1 | 1 | 1 | 3 |
| hsa-miR-4324    | MIER1   | 1 | 1 | 1 | 3 |
| hsa-miR-6783-5p | MAP3K9  | 1 | 1 | 1 | 3 |
| hsa-miR-4469    | SMG7    | 1 | 1 | 1 | 3 |
| hsa-miR-6783-5p | TMEM81  | 1 | 1 | 1 | 3 |
| hsa-miR-7106-5p | MAT2A   | 1 | 1 | 1 | 3 |
| hsa-miR-6828-5p | PHF19   | 1 | 1 | 1 | 3 |
| hsa-miR-4324    | LPAR2   | 1 | 1 | 1 | 3 |
| hsa-miR-6825-5p | UNC13A  | 1 | 1 | 1 | 3 |
| hsa-miR-3918    | CSDC2   | 1 | 1 | 1 | 3 |
| hsa-miR-5094    | ZNF805  | 1 | 1 | 1 | 3 |
| hsa-miR-7160-5p | APAF1   | 1 | 1 | 1 | 3 |
| hsa-miR-194-3p  | SPATA13 | 1 | 1 | 1 | 3 |
| hsa-miR-7160-5p | MXRA7   | 1 | 1 | 1 | 3 |

|                 |         |   |   |   |   |
|-----------------|---------|---|---|---|---|
| hsa-miR-760     | RIC8A   | 1 | 1 | 1 | 3 |
| hsa-miR-558     | CARD8   | 1 | 1 | 1 | 3 |
| hsa-miR-5094    | DENND5B | 1 | 1 | 1 | 3 |
| hsa-miR-4713-5p | KRBOX4  | 1 | 1 | 1 | 3 |
| hsa-miR-6783-5p | NRBP1   | 1 | 1 | 1 | 3 |
| hsa-miR-7106-5p | UBE2D4  | 1 | 1 | 1 | 3 |
| hsa-miR-7106-5p | TRIM67  | 1 | 1 | 1 | 3 |
| hsa-miR-5693    | CLDN12  | 1 | 1 | 1 | 3 |
| hsa-miR-6799-5p | SAMD4B  | 1 | 1 | 1 | 3 |
| hsa-miR-6825-5p | SCAMP4  | 1 | 1 | 1 | 3 |
| hsa-miR-6867-3p | TSPAN11 | 1 | 1 | 1 | 3 |
| hsa-miR-6895-5p | AHCYL2  | 1 | 1 | 1 | 3 |
| hsa-miR-6845-3p | ZNF594  | 1 | 1 | 1 | 3 |
| hsa-miR-4713-5p | TBC1D13 | 1 | 1 | 1 | 3 |
| hsa-miR-6783-5p | PPFIA3  | 1 | 1 | 1 | 3 |
| hsa-miR-6825-5p | NFIX    | 1 | 1 | 1 | 3 |
| hsa-miR-6828-5p | CORO1C  | 1 | 1 | 1 | 3 |
| hsa-miR-3175    | ADRA2B  | 1 | 1 | 1 | 3 |
| hsa-miR-1909-5p | RP1L1   | 1 | 1 | 1 | 3 |
| hsa-miR-4437    | GDE1    | 1 | 1 | 1 | 3 |
| hsa-miR-544b    | IGF2BP3 | 1 | 1 | 1 | 3 |
| hsa-miR-7106-5p | DNAJC8  | 1 | 1 | 1 | 3 |
| hsa-miR-6783-5p | GABPA   | 1 | 1 | 1 | 3 |
| hsa-miR-4437    | SETD5   | 1 | 1 | 1 | 3 |
| hsa-miR-4257    | ATXN1L  | 1 | 1 | 1 | 3 |
| hsa-miR-7106-5p | TGIF1   | 1 | 1 | 1 | 3 |
| hsa-miR-4469    | MED8    | 1 | 1 | 1 | 3 |
| hsa-miR-1296-3p | IDS     | 1 | 1 | 1 | 3 |

|                 |          |   |   |   |   |
|-----------------|----------|---|---|---|---|
| hsa-miR-4437    | AMOTL2   | 1 | 1 | 1 | 3 |
| hsa-miR-4469    | KCNQ3    | 1 | 1 | 1 | 3 |
| hsa-miR-1296-3p | MIER3    | 1 | 1 | 1 | 3 |
| hsa-miR-7106-5p | USB1     | 1 | 1 | 1 | 3 |
| hsa-miR-6867-3p | KCNQ3    | 1 | 1 | 1 | 3 |
| hsa-miR-7106-5p | PFN1     | 1 | 1 | 1 | 3 |
| hsa-miR-4469    | PELI3    | 1 | 1 | 1 | 3 |
| hsa-miR-3175    | CALR     | 1 | 1 | 1 | 3 |
| hsa-miR-1296-3p | TNFAIP1  | 1 | 1 | 1 | 3 |
| hsa-miR-3175    | C12orf49 | 1 | 1 | 1 | 3 |
| hsa-miR-7106-5p | RAD51B   | 1 | 1 | 1 | 3 |
| hsa-miR-7106-5p | URM1     | 1 | 1 | 1 | 3 |
| hsa-miR-671-5p  | DDX39B   | 1 | 1 | 1 | 3 |
| hsa-miR-6895-5p | FLOT2    | 1 | 1 | 1 | 3 |
| hsa-miR-194-3p  | PPP1R10  | 1 | 1 | 1 | 3 |
| hsa-miR-6895-5p | ITM2C    | 1 | 1 | 1 | 3 |
| hsa-miR-671-5p  | PSMB2    | 1 | 1 | 1 | 3 |
| hsa-miR-760     | HMGA2    | 1 | 1 | 1 | 3 |
| hsa-miR-8077    | FABP3    | 1 | 1 | 1 | 3 |
| hsa-miR-6825-5p | STOML3   | 1 | 1 | 1 | 3 |
| hsa-miR-6845-3p | PIGA     | 1 | 1 | 1 | 3 |
| hsa-miR-4324    | NUP98    | 1 | 1 | 1 | 3 |
| hsa-miR-1296-3p | HMGA2    | 1 | 1 | 1 | 3 |
| hsa-miR-186-3p  | VPS53    | 1 | 1 | 1 | 3 |
| hsa-miR-7160-5p | CRKL     | 1 | 1 | 1 | 3 |
| hsa-miR-6825-5p | RASGRP3  | 1 | 1 | 1 | 3 |
| hsa-miR-671-5p  | LIN7C    | 1 | 1 | 1 | 3 |
| hsa-miR-7106-5p | KCND1    | 1 | 1 | 1 | 3 |

|                 |           |   |   |   |   |
|-----------------|-----------|---|---|---|---|
| hsa-miR-7106-5p | ITGA3     | 1 | 1 | 1 | 3 |
| hsa-miR-6783-5p | ANKRD45   | 1 | 1 | 1 | 3 |
| hsa-miR-6870-3p | KCNJ1     | 1 | 1 | 1 | 3 |
| hsa-miR-3160-3p | PARD6B    | 1 | 1 | 1 | 3 |
| hsa-miR-4713-5p | SLC25A44  | 1 | 1 | 1 | 3 |
| hsa-miR-296-5p  | NFIC      | 1 | 1 | 1 | 3 |
| hsa-miR-4324    | TP53INP1  | 1 | 1 | 1 | 3 |
| hsa-miR-760     | HM13      | 1 | 1 | 1 | 3 |
| hsa-miR-4713-5p | LRRC38    | 1 | 1 | 1 | 3 |
| hsa-miR-760     | HIST1H2AE | 1 | 1 | 1 | 3 |
| hsa-miR-670-5p  | ZNF385A   | 1 | 1 | 1 | 3 |
| hsa-miR-7160-5p | CD3EAP    | 1 | 1 | 1 | 3 |
| hsa-miR-1227-5p | TOM1      | 1 | 1 | 1 | 3 |
| hsa-miR-3175    | NFAT5     | 1 | 1 | 1 | 3 |
| hsa-miR-194-3p  | PSMC2     | 1 | 1 | 1 | 3 |
| hsa-miR-186-3p  | NUFIP2    | 1 | 1 | 1 | 3 |
| hsa-miR-6799-5p | DISC1     | 1 | 1 | 1 | 3 |
| hsa-miR-7160-5p | ZBTB4     | 1 | 1 | 1 | 3 |
| hsa-miR-3175    | UBE4B     | 1 | 1 | 1 | 3 |
| hsa-miR-6825-5p | REG4      | 1 | 1 | 1 | 3 |
| hsa-miR-7106-5p | IQSEC3    | 1 | 1 | 1 | 3 |
| hsa-miR-1296-5p | ANKRD24   | 1 | 1 | 1 | 3 |
| hsa-miR-4257    | GRPEL2    | 1 | 1 | 1 | 3 |
| hsa-miR-6799-5p | MOCS3     | 1 | 1 | 1 | 3 |
| hsa-miR-6854-5p | SCAMP2    | 1 | 1 | 1 | 3 |
| hsa-miR-7106-5p | BTF3L4    | 1 | 1 | 1 | 3 |
| hsa-miR-7160-5p | CBFA2T2   | 1 | 1 | 1 | 3 |
| hsa-miR-6828-5p | LUZP1     | 1 | 1 | 1 | 3 |

|                 |          |   |   |   |   |
|-----------------|----------|---|---|---|---|
| hsa-miR-7113-3p | EMX2     | 1 | 1 | 1 | 3 |
| hsa-miR-186-3p  | KIAA0930 | 1 | 1 | 1 | 3 |
| hsa-miR-4324    | YARS     | 1 | 1 | 1 | 3 |
| hsa-miR-7160-5p | FBXW8    | 1 | 1 | 1 | 3 |
| hsa-miR-671-5p  | HNRNPUL1 | 1 | 1 | 1 | 3 |
| hsa-miR-6867-3p | CCDC43   | 1 | 1 | 1 | 3 |
| hsa-miR-6825-5p | KCTD2    | 1 | 1 | 1 | 3 |
| hsa-miR-6799-5p | SLC30A7  | 1 | 1 | 1 | 3 |
| hsa-miR-6845-3p | C19orf68 | 1 | 1 | 1 | 3 |
| hsa-miR-6087    | NCOR2    | 1 | 1 | 1 | 3 |
| hsa-miR-6828-5p | BUB3     | 1 | 1 | 1 | 3 |
| hsa-miR-6847-5p | RNF185   | 1 | 1 | 1 | 3 |
| hsa-miR-6825-5p | ARHGAP31 | 1 | 1 | 1 | 3 |
| hsa-miR-7106-5p | TMEM63C  | 1 | 1 | 1 | 3 |
| hsa-miR-6845-3p | ZNF701   | 1 | 1 | 1 | 3 |
| hsa-miR-7106-5p | NAV1     | 1 | 1 | 1 | 3 |
| hsa-miR-3175    | PRRT2    | 1 | 1 | 1 | 3 |
| hsa-miR-7106-5p | ATXN7L3  | 1 | 1 | 1 | 3 |
| hsa-miR-3175    | SHISA6   | 1 | 1 | 1 | 3 |
| hsa-miR-671-5p  | CRTC3    | 1 | 1 | 1 | 3 |
| hsa-miR-4487    | TRAF1    | 1 | 1 | 1 | 3 |
| hsa-miR-6825-5p | CRY2     | 1 | 1 | 1 | 3 |
| hsa-miR-3175    | PSME3    | 1 | 1 | 1 | 3 |
| hsa-miR-4713-5p | EREG     | 1 | 1 | 1 | 3 |
| hsa-miR-194-3p  | RAP1GDS1 | 1 | 1 | 1 | 3 |
| hsa-miR-4469    | SPTLC2   | 1 | 1 | 1 | 3 |
| hsa-miR-6828-5p | TMCC1    | 1 | 1 | 1 | 3 |
| hsa-miR-6867-3p | NEURL1B  | 1 | 1 | 1 | 3 |

|                 |         |   |   |   |   |
|-----------------|---------|---|---|---|---|
| hsa-miR-671-5p  | HMGA1   | 1 | 1 | 1 | 3 |
| hsa-miR-127-5p  | KANSL1  | 1 | 1 | 1 | 3 |
| hsa-miR-296-5p  | SYT2    | 1 | 1 | 1 | 3 |
| hsa-miR-6845-3p | STMN4   | 1 | 1 | 1 | 3 |
| hsa-miR-6825-5p | RAC1    | 1 | 1 | 1 | 3 |
| hsa-miR-6783-5p | KIF6    | 1 | 1 | 1 | 3 |
| hsa-miR-7106-5p | KCNA5   | 1 | 1 | 1 | 3 |
| hsa-miR-7106-5p | MOB1B   | 1 | 1 | 1 | 3 |
| hsa-miR-491-5p  | DIRAS1  | 1 | 1 | 1 | 3 |
| hsa-miR-491-5p  | BCL2L1  | 1 | 1 | 1 | 3 |
| hsa-miR-4276    | ALDH9A1 | 1 | 1 | 1 | 3 |
| hsa-miR-27b-5p  | RAB22A  | 1 | 1 | 1 | 3 |
| hsa-miR-4324    | NCOA3   | 1 | 1 | 1 | 3 |
| hsa-miR-491-5p  | PPP1R10 | 1 | 1 | 1 | 3 |
| hsa-miR-6828-5p | SRSF4   | 1 | 1 | 1 | 3 |
| hsa-miR-7106-5p | PGPEP1  | 1 | 1 | 1 | 3 |
| hsa-miR-3175    | DYRK1B  | 1 | 1 | 1 | 3 |
| hsa-miR-146b-3p | CPS1    | 1 | 1 | 1 | 3 |
| hsa-miR-296-5p  | RNF44   | 1 | 1 | 1 | 3 |
| hsa-miR-6825-5p | GATAD2A | 1 | 1 | 1 | 3 |
| hsa-miR-5693    | IP6K1   | 1 | 1 | 1 | 3 |
| hsa-miR-8077    | SEMA5A  | 1 | 1 | 1 | 3 |
| hsa-miR-670-5p  | YOD1    | 1 | 1 | 1 | 3 |
| hsa-miR-3175    | SAMD9L  | 1 | 1 | 1 | 3 |
| hsa-miR-3175    | HNRNPA3 | 1 | 1 | 1 | 3 |
| hsa-miR-1296-5p | HYOU1   | 1 | 1 | 1 | 3 |
| hsa-miR-6845-3p | ZNF622  | 1 | 1 | 1 | 3 |
| hsa-miR-6867-3p | DDX42   | 1 | 1 | 1 | 3 |

|                 |          |   |   |   |   |
|-----------------|----------|---|---|---|---|
| hsa-miR-4437    | UBE2D2   | 1 | 1 | 1 | 3 |
| hsa-miR-3160-3p | CARD8    | 1 | 1 | 1 | 3 |
| hsa-miR-6828-5p | GSKIP    | 1 | 1 | 1 | 3 |
| hsa-miR-7160-5p | TSPYL1   | 1 | 1 | 1 | 3 |
| hsa-miR-5693    | EMP2     | 1 | 1 | 1 | 3 |
| hsa-miR-6845-3p | SNRK     | 1 | 1 | 1 | 3 |
| hsa-miR-7106-5p | CAPZB    | 1 | 1 | 1 | 3 |
| hsa-miR-7106-5p | NRBP1    | 1 | 1 | 1 | 3 |
| hsa-miR-4469    | C15orf52 | 1 | 1 | 1 | 3 |
| hsa-miR-4324    | ARPP19   | 1 | 1 | 1 | 3 |
| hsa-miR-5693    | DDAH1    | 1 | 1 | 1 | 3 |
| hsa-miR-6825-5p | PRELP    | 1 | 1 | 1 | 3 |
| hsa-miR-491-5p  | SETD1B   | 1 | 1 | 1 | 3 |
| hsa-miR-4446-3p | MAP3K9   | 1 | 1 | 1 | 3 |
| hsa-miR-7160-5p | KRT8     | 1 | 1 | 1 | 3 |
| hsa-miR-6870-3p | ELOVL4   | 1 | 1 | 1 | 3 |
| hsa-miR-4663    | RAB2A    | 1 | 1 | 1 | 3 |
| hsa-miR-6845-3p | SHOX2    | 1 | 1 | 1 | 3 |
| hsa-miR-7106-5p | FOSL2    | 1 | 1 | 1 | 3 |
| hsa-miR-670-5p  | PLXDC1   | 1 | 1 | 1 | 3 |
| hsa-miR-7113-3p | ZNF512B  | 1 | 1 | 1 | 3 |
| hsa-miR-6845-3p | ARPP19   | 1 | 1 | 1 | 3 |
| hsa-miR-6796-3p | C2orf49  | 1 | 1 | 1 | 3 |
| hsa-miR-194-3p  | ERI2     | 1 | 1 | 1 | 3 |
| hsa-miR-4276    | SUMO1    | 1 | 1 | 1 | 3 |
| hsa-miR-194-3p  | MRI1     | 1 | 1 | 1 | 3 |
| hsa-miR-186-3p  | CPT1A    | 1 | 1 | 1 | 3 |
| hsa-miR-6822-3p | NLK      | 1 | 1 | 1 | 3 |

|                 |          |   |   |   |   |
|-----------------|----------|---|---|---|---|
| hsa-miR-8077    | KIF3B    | 1 | 1 | 1 | 3 |
| hsa-miR-4446-3p | ORC5     | 1 | 1 | 1 | 3 |
| hsa-miR-6825-5p | CELSR2   | 1 | 1 | 1 | 3 |
| hsa-miR-6845-3p | FAXC     | 1 | 1 | 1 | 3 |
| hsa-miR-6828-5p | ZNF585B  | 1 | 1 | 1 | 3 |
| hsa-miR-760     | PUM1     | 1 | 1 | 1 | 3 |
| hsa-miR-7160-5p | CLCC1    | 1 | 1 | 1 | 3 |
| hsa-miR-4437    | CC2D1B   | 1 | 1 | 1 | 3 |
| hsa-miR-4682    | STK4     | 1 | 1 | 1 | 3 |
| hsa-miR-3158-3p | UBXN2B   | 1 | 1 | 1 | 3 |
| hsa-miR-186-3p  | EMP2     | 1 | 1 | 1 | 3 |
| hsa-miR-6825-5p | VWA1     | 1 | 1 | 1 | 3 |
| hsa-miR-4276    | DENND2C  | 1 | 1 | 1 | 3 |
| hsa-miR-558     | SLC35A5  | 1 | 1 | 1 | 3 |
| hsa-miR-6828-5p | CRTC3    | 1 | 1 | 1 | 3 |
| hsa-miR-6796-3p | SERINC5  | 1 | 1 | 1 | 3 |
| hsa-miR-6825-5p | FNBP1    | 1 | 1 | 1 | 3 |
| hsa-miR-670-5p  | GJB7     | 1 | 1 | 1 | 3 |
| hsa-miR-6828-5p | ARIH1    | 1 | 1 | 1 | 3 |
| hsa-miR-4276    | C5orf30  | 1 | 1 | 1 | 3 |
| hsa-miR-7106-5p | RAP1GAP2 | 1 | 1 | 1 | 3 |
| hsa-miR-6828-5p | EIF4H    | 1 | 1 | 1 | 3 |
| hsa-miR-7160-5p | TFCP2L1  | 1 | 1 | 1 | 3 |
| hsa-miR-6799-5p | ANKRD40  | 1 | 1 | 1 | 3 |
| hsa-miR-6854-5p | LAPTM4B  | 1 | 1 | 1 | 3 |
| hsa-miR-6783-5p | TAB2     | 1 | 1 | 1 | 3 |
| hsa-miR-6825-5p | ARRB1    | 1 | 1 | 1 | 3 |
| hsa-miR-6847-5p | LUC7L2   | 1 | 1 | 1 | 3 |

|                 |           |   |   |   |   |
|-----------------|-----------|---|---|---|---|
| hsa-miR-7160-5p | HJURP     | 1 | 1 | 1 | 3 |
| hsa-miR-6825-5p | TP53      | 1 | 1 | 1 | 3 |
| hsa-miR-6854-5p | PRDM2     | 1 | 1 | 1 | 3 |
| hsa-miR-194-3p  | IP6K1     | 1 | 1 | 1 | 3 |
| hsa-miR-1227-5p | HNRNPA0   | 1 | 1 | 1 | 3 |
| hsa-miR-6825-5p | SLC4A2    | 1 | 1 | 1 | 3 |
| hsa-miR-27b-5p  | TRPS1     | 1 | 1 | 1 | 3 |
| hsa-miR-6895-5p | ANKRD24   | 1 | 1 | 1 | 3 |
| hsa-miR-670-5p  | ZSWIM6    | 1 | 1 | 1 | 3 |
| hsa-miR-296-5p  | TOM1      | 1 | 1 | 1 | 3 |
| hsa-miR-7160-3p | IGF2BP1   | 1 | 1 | 1 | 3 |
| hsa-miR-670-5p  | PCTP      | 1 | 1 | 1 | 3 |
| hsa-miR-7106-5p | RPRD2     | 1 | 1 | 1 | 3 |
| hsa-miR-4469    | SZRD1     | 1 | 1 | 1 | 3 |
| hsa-miR-6799-5p | HIC2      | 1 | 1 | 1 | 3 |
| hsa-miR-8077    | DYRK2     | 1 | 1 | 1 | 3 |
| hsa-miR-6799-5p | SLC35E2   | 1 | 1 | 1 | 3 |
| hsa-miR-6825-5p | ANK1      | 1 | 1 | 1 | 3 |
| hsa-miR-760     | HIST2H2BE | 1 | 1 | 1 | 3 |
| hsa-miR-4469    | ZNF483    | 1 | 1 | 1 | 3 |
| hsa-miR-4487    | LUZP1     | 1 | 1 | 1 | 3 |
| hsa-miR-7106-5p | ARRB1     | 1 | 1 | 1 | 3 |
| hsa-miR-670-5p  | PPP2CA    | 1 | 1 | 1 | 3 |
| hsa-miR-296-5p  | PSMF1     | 1 | 1 | 1 | 3 |
| hsa-miR-6845-3p | LSAMP     | 1 | 1 | 1 | 3 |
| hsa-miR-8077    | GPR89A    | 1 | 1 | 1 | 3 |
| hsa-miR-127-5p  | SRSF11    | 1 | 1 | 1 | 3 |
| hsa-miR-6825-5p | TGIF1     | 1 | 1 | 1 | 3 |

|                 |         |   |   |   |   |
|-----------------|---------|---|---|---|---|
| hsa-miR-6825-5p | MYO1C   | 1 | 1 | 1 | 3 |
| hsa-miR-4276    | SPG20   | 1 | 1 | 1 | 3 |
| hsa-miR-6825-5p | ICK     | 1 | 1 | 1 | 3 |
| hsa-miR-6799-5p | ZCCHC24 | 1 | 1 | 1 | 3 |
| hsa-miR-5693    | LRAT    | 1 | 1 | 1 | 3 |
| hsa-miR-186-3p  | SLC43A3 | 1 | 1 | 1 | 3 |
| hsa-miR-3151-5p | HNRNPA0 | 1 | 1 | 1 | 3 |
| hsa-miR-7106-5p | CCL11   | 1 | 1 | 1 | 3 |
| hsa-miR-6825-5p | MEX3A   | 1 | 1 | 1 | 3 |
| hsa-miR-4469    | GNAZ    | 1 | 1 | 1 | 3 |
| hsa-miR-127-5p  | LIN7C   | 1 | 1 | 1 | 3 |
| hsa-miR-7160-3p | SLC7A5  | 1 | 1 | 1 | 3 |
| hsa-miR-4512    | ALG9    | 1 | 1 | 1 | 3 |
| hsa-miR-6822-3p | PKM     | 1 | 1 | 1 | 3 |
| hsa-miR-7113-3p | PTPN14  | 1 | 1 | 1 | 3 |
| hsa-miR-4276    | YWHAE   | 1 | 1 | 1 | 3 |
| hsa-miR-186-3p  | GPRIN3  | 1 | 1 | 1 | 3 |
| hsa-miR-6825-5p | NLRC3   | 1 | 1 | 1 | 3 |
| hsa-miR-6825-5p | TIGD5   | 1 | 1 | 1 | 3 |
| hsa-miR-5693    | ZSCAN29 | 1 | 1 | 1 | 3 |
| hsa-miR-6825-5p | CASKIN1 | 1 | 1 | 1 | 3 |
| hsa-miR-6851-3p | NAA15   | 1 | 1 | 1 | 3 |
| hsa-miR-4446-3p | LAPTM5  | 1 | 1 | 1 | 3 |
| hsa-miR-186-3p  | POGZ    | 1 | 1 | 1 | 3 |
| hsa-miR-18b-3p  | ZNF644  | 1 | 1 | 1 | 3 |
| hsa-miR-1296-3p | UBTF    | 1 | 1 | 1 | 3 |
| hsa-miR-194-3p  | KLK10   | 1 | 1 | 1 | 3 |
| hsa-miR-194-3p  | LOXL2   | 1 | 1 | 1 | 3 |

|                 |         |   |   |   |   |
|-----------------|---------|---|---|---|---|
| hsa-miR-491-5p  | AR      | 1 | 1 | 1 | 3 |
| hsa-miR-4276    | AAR2    | 1 | 1 | 1 | 3 |
| hsa-miR-186-3p  | GK5     | 1 | 1 | 1 | 3 |
| hsa-miR-7160-5p | GTPBP2  | 1 | 1 | 1 | 3 |
| hsa-miR-194-3p  | YWHAE   | 1 | 1 | 1 | 3 |
| hsa-miR-296-5p  | GIGYF1  | 1 | 1 | 1 | 3 |
| hsa-miR-127-5p  | LGALS8  | 1 | 1 | 1 | 3 |
| hsa-miR-1227-5p | DDI2    | 1 | 1 | 1 | 3 |
| hsa-miR-760     | SRRM1   | 1 | 1 | 1 | 3 |
| hsa-miR-4437    | PLIN5   | 1 | 1 | 1 | 3 |
| hsa-miR-4732-3p | MAT2A   | 1 | 1 | 1 | 3 |
| hsa-miR-670-5p  | SEMA4C  | 1 | 1 | 1 | 3 |
| hsa-miR-7106-5p | RPP25   | 1 | 1 | 1 | 3 |
| hsa-miR-4324    | ZSWIM6  | 1 | 1 | 1 | 3 |
| hsa-miR-8077    | GPR89B  | 1 | 1 | 1 | 3 |
| hsa-miR-6825-5p | AMER1   | 1 | 1 | 1 | 3 |
| hsa-miR-1296-3p | PKM     | 1 | 1 | 1 | 3 |
| hsa-miR-6847-3p | CKS2    | 1 | 1 | 1 | 3 |
| hsa-miR-4469    | SEC63   | 1 | 1 | 1 | 3 |
| hsa-miR-7160-5p | FMNL3   | 1 | 1 | 1 | 3 |
| hsa-miR-4324    | PCTP    | 1 | 1 | 1 | 3 |
| hsa-miR-18b-3p  | ANKRD52 | 1 | 1 | 1 | 3 |
| hsa-miR-6783-5p | CHD8    | 1 | 1 | 1 | 3 |
| hsa-miR-7106-5p | EPB41L1 | 1 | 1 | 1 | 3 |
| hsa-miR-7106-5p | MBD6    | 1 | 1 | 1 | 3 |
| hsa-miR-6895-5p | KIF5B   | 1 | 1 | 1 | 3 |
| hsa-miR-6825-5p | MARK2   | 1 | 1 | 1 | 3 |
| hsa-miR-4469    | GJB1    | 1 | 1 | 1 | 3 |

|                 |          |   |   |   |   |
|-----------------|----------|---|---|---|---|
| hsa-miR-4682    | B3GALT5  | 1 | 1 | 1 | 3 |
| hsa-miR-7160-5p | KIAA1328 | 1 | 1 | 1 | 3 |
| hsa-miR-6867-3p | TMEM87B  | 1 | 1 | 1 | 3 |
| hsa-miR-491-5p  | SCRT1    | 1 | 1 | 1 | 3 |
| hsa-miR-4324    | ANKRD33B | 1 | 1 | 1 | 3 |
| hsa-miR-6508-3p | ITPRIP   | 1 | 1 | 1 | 3 |
| hsa-miR-4276    | SOX4     | 1 | 1 | 1 | 3 |
| hsa-miR-4487    | HIF1A    | 1 | 1 | 1 | 3 |
| hsa-miR-671-5p  | MYH9     | 1 | 1 | 1 | 3 |
| hsa-miR-6075    | KIF2C    | 1 | 1 | 1 | 3 |
| hsa-miR-6847-3p | SRP14    | 1 | 1 | 1 | 3 |
| hsa-miR-6845-3p | RPP25    | 1 | 1 | 1 | 3 |
| hsa-miR-5094    | TNRC6A   | 1 | 1 | 1 | 3 |
| hsa-miR-6825-5p | HEXA     | 1 | 1 | 1 | 3 |
| hsa-miR-7106-5p | PARP11   | 1 | 1 | 1 | 3 |
| hsa-miR-3175    | EIF5AL1  | 1 | 1 | 1 | 3 |
| hsa-miR-4713-5p | ATP2B1   | 1 | 1 | 1 | 3 |
| hsa-miR-491-5p  | ARRB1    | 1 | 1 | 1 | 3 |
| hsa-miR-4713-5p | RUNDC3B  | 1 | 1 | 1 | 3 |
| hsa-miR-7106-5p | PEX11B   | 1 | 1 | 1 | 3 |
| hsa-miR-3918    | FLOT2    | 1 | 1 | 1 | 3 |
| hsa-miR-6847-5p | COX6B1   | 1 | 1 | 1 | 3 |
| hsa-miR-4469    | PPP1R1A  | 1 | 1 | 1 | 3 |
| hsa-miR-4324    | SIAH3    | 1 | 1 | 1 | 3 |
| hsa-miR-194-3p  | HOXC4    | 1 | 1 | 1 | 3 |
| hsa-miR-5088-5p | XRCC6    | 1 | 1 | 1 | 3 |
| hsa-miR-7106-5p | CBS      | 1 | 1 | 1 | 3 |
| hsa-miR-6847-5p | CDK2     | 1 | 1 | 1 | 3 |

|                 |           |   |   |   |   |
|-----------------|-----------|---|---|---|---|
| hsa-miR-6825-5p | OGG1      | 1 | 1 | 1 | 3 |
| hsa-miR-7106-5p | ARHGAP31  | 1 | 1 | 1 | 3 |
| hsa-miR-7106-5p | DISC1     | 1 | 1 | 1 | 3 |
| hsa-miR-7106-5p | CLSTN1    | 1 | 1 | 1 | 3 |
| hsa-miR-4437    | PLAGL2    | 1 | 1 | 1 | 3 |
| hsa-miR-7106-5p | HECTD3    | 1 | 1 | 1 | 3 |
| hsa-miR-6799-5p | IGFBP4    | 1 | 1 | 1 | 3 |
| hsa-miR-7106-5p | SLC35F6   | 1 | 1 | 1 | 3 |
| hsa-miR-4487    | SETD3     | 1 | 1 | 1 | 3 |
| hsa-miR-4487    | FGD4      | 1 | 1 | 1 | 3 |
| hsa-miR-6796-3p | SSFA2     | 1 | 1 | 1 | 3 |
| hsa-miR-6867-3p | SLC27A2   | 1 | 1 | 1 | 3 |
| hsa-miR-194-3p  | QRFPR     | 1 | 1 | 1 | 3 |
| hsa-miR-4663    | FGD6      | 1 | 1 | 1 | 3 |
| hsa-miR-3175    | C6orf106  | 1 | 1 | 1 | 3 |
| hsa-miR-7160-5p | MORN4     | 1 | 1 | 1 | 3 |
| hsa-miR-6895-5p | KMT2A     | 1 | 1 | 1 | 3 |
| hsa-miR-4276    | LDHA      | 1 | 1 | 1 | 3 |
| hsa-miR-4257    | PIM3      | 1 | 1 | 1 | 3 |
| hsa-miR-6742-5p | NFIX      | 1 | 1 | 1 | 3 |
| hsa-miR-6825-5p | RAB11FIP4 | 1 | 1 | 1 | 3 |
| hsa-miR-6825-5p | ZBTB7A    | 1 | 1 | 1 | 3 |
| hsa-miR-6867-3p | TXLNB     | 1 | 1 | 1 | 3 |
| hsa-miR-7106-5p | TBXA2R    | 1 | 1 | 1 | 3 |
| hsa-miR-4446-3p | NFASC     | 1 | 1 | 1 | 3 |
| hsa-miR-491-5p  | APH1A     | 1 | 1 | 1 | 3 |
| hsa-miR-6847-5p | KPNA2     | 1 | 1 | 1 | 3 |
| hsa-miR-670-5p  | DHX33     | 1 | 1 | 1 | 3 |

|                 |          |   |   |   |   |
|-----------------|----------|---|---|---|---|
| hsa-miR-760     | CPSF7    | 1 | 1 | 1 | 3 |
| hsa-miR-6825-5p | NRBP1    | 1 | 1 | 1 | 3 |
| hsa-miR-4324    | SGPL1    | 1 | 1 | 1 | 3 |
| hsa-miR-4276    | NAA15    | 1 | 1 | 1 | 3 |
| hsa-miR-6825-5p | RNF157   | 1 | 1 | 1 | 3 |
| hsa-miR-7106-5p | PDPR     | 1 | 1 | 1 | 3 |
| hsa-miR-7106-5p | TOB2     | 1 | 1 | 1 | 3 |
| hsa-miR-6847-5p | PPP2R5E  | 1 | 1 | 1 | 3 |
| hsa-miR-1909-5p | CDKN1B   | 1 | 1 | 1 | 3 |
| hsa-miR-146b-3p | KLHDC8B  | 1 | 1 | 1 | 3 |
| hsa-miR-671-5p  | LGALS3BP | 1 | 1 | 1 | 3 |
| hsa-miR-760     | ANKFY1   | 1 | 1 | 1 | 3 |
| hsa-miR-7106-5p | SLC29A2  | 1 | 1 | 1 | 3 |
| hsa-miR-296-5p  | SOX12    | 1 | 1 | 1 | 3 |
| hsa-miR-4276    | HHLA2    | 1 | 1 | 1 | 3 |
| hsa-miR-6822-3p | SLC35A1  | 1 | 1 | 1 | 3 |
| hsa-miR-3918    | SSTR3    | 1 | 1 | 1 | 3 |
| hsa-miR-146b-3p | FAM84B   | 1 | 1 | 1 | 3 |
| hsa-miR-491-5p  | TNFAIP1  | 1 | 1 | 1 | 3 |
| hsa-miR-7106-5p | SAP18    | 1 | 1 | 1 | 3 |
| hsa-miR-4446-3p | MNT      | 1 | 1 | 1 | 3 |
| hsa-miR-4487    | RUNX3    | 1 | 1 | 1 | 3 |

miRNA/miR, microRNA; circ, circular RNA; hsa, Homo sapiens.
